# Supplementary material for: Readmissions and mortality in delirious versus non-delirious octogenarian patients after aortic valve therapy: a prospective cohort study
Source: PubMed Central journal article supplement — BMJ Open. 2016 Oct 5;6(10):e012683. doi: 10.1136/bmjopen-2016-012683 (PMC5073576; doi:10.1136/bmjopen-2016-012683), 2016-10-05
Supplement: bmjopen-2016-012683supp_appendix.pdf [file bmjopen-2016-012683supp_appendix.pdf]

**Appendix I.** Place of living for delirious and non-delirious octogenarian patients one and six months after undergoing transcatheter aortic valve implantation (TAVI) or surgical aortic valve replacement (SAVR).

| Living situation | Non-delirium<br>N = 60 |                                      |          |                                      | Delirium<br>N = 76 |                                      |          |                                      |
|------------------|------------------------|--------------------------------------|----------|--------------------------------------|--------------------|--------------------------------------|----------|--------------------------------------|
|                  | 30 days                |                                      | 180 days |                                      | 30 days            |                                      | 180 days |                                      |
|                  | Count                  | % of patients evaluated for delirium | Count    | % of patients evaluated for delirium | Count              | % of patients evaluated for delirium | Count    | % of patients evaluated for delirium |
| Home             | 48                     | 37                                   | 53       | 45                                   | 50                 | 39                                   | 62       | 52                                   |
| Hospital         | 3                      | 2                                    | 0        | 0                                    | 13                 | 10                                   | 0        | 0                                    |
| Rehabilitation   | 6                      | 5                                    | 0        | 0                                    | 7                  | 5                                    | 0        | 0                                    |
| Nursing home     | 0                      | 0                                    | 1        | 1                                    | 1                  | 1                                    | 2        | 2                                    |
